# Supplementary material for: Development of Moral Root Scale for Primary School Students
Source: Research Square preprint supplement (doi:10.21203/rs.3.rs-7879643/v1), 2025-12-01
Supplement: Supplementary file 1 [file 6b51d34c3a389c38466bdd94.docx]

**İnterview Questions**

1.How do you feel when you violate a family rule?

2.What is your main drive in avoiding making a mistake: avoidance of being blamed by others or avoidance of guilt?
