# Supplementary material for: Development of Moral Root Scale for Primary School Students
Source: Research Square preprint supplement (doi:10.21203/rs.3.rs-7879643/v1), 2025-12-01
Supplement: Supplementary file 2 [file a3a446d560d2e97d3566dc19.docx]

**Development of Moral Root Scale for Primary School Students**

Cihan KARA, Ph.D.

Department of Primary Education, Artvin Coruh University, Turkey, Education Faculty, 08000 Artvin/ Turkey

Mail: [cihankara-tr@hotmail.com](mailto:cihankara-tr@hotmail.com)

Orcid No: 0000-0002-8230-810X

Kerem COŞKUN, Ph.D.

Department of Primary Education, Artvin Coruh University, Turkey, Education Faculty, 08000 Artvin/ Turkey

Mail: [keremcoskun@outlook.com](mailto:keremcoskun@outlook.com)

Orcid No: 0000-0002-3343-2112

Sevim Burçin GÜLTEKİN, Ph.D

Department of Primary Education, Artvin Coruh University, Turkey, Education Faculty, 08000 Artvin/ Turkey

Mail: [burcin.gultekin@artvin.edu.tr](mailto:burcin.gultekin@artvin.edu.tr) (Corresponding Author)

Orcid No: 0000-0002-3867-0080

**Development of Moral Root Scale for Primary School Students**

**Abstract**

**Background** The present research aimed to develop the Moral Root Scale (MRS) for primary school students.

**Methods** First, item analysis and latent construct determination were performed. A total of 278 children participated in the sample for item analysis and exploratory factor analysis. For this, 13 items were subjected to item analysis and 2 items were excluded from the rest of the analysis. A single factor structure with 11 items was identified and accounted for 50% of total variance. The single factor structure was tested with participation of 124 primary school students and confirmatory factor analysis revealed that the MRS had good model fit indices. Convergent validity was conducted through average variance extracted and examination of correlation with MIT with participation of 139 primary school students. Reliability analysis proved that the MRS is a reliable instrument.

**Conclusion** Overall results indicate that the MRS is a reliable and valid instrument to measure moral roots in primary school students.

**Key words:** Moral root, primary school children, scale development

**Background**

Domination of mankind over the world and establishment of civilizations depend on the fact that humans can live in huge numbers in coordination with each other and with several rules and principles [21]. These rules and principles have been conceptualized in different terms. Morality is one of the terms that regulates social interaction. Morality refers to sets of beliefs about what is acceptable or right and what is unacceptable or wrong [3]. Morality provides a code of conduct for all members of a society and prevents uncertainty. It encourages and sustains cooperation among humans because it makes people set aside competition and work together towards the common good. In other words, morality activates altruism. Therefore, morality is crucial for survival of human societies because survival of any social group rests on cooperation among its members rather than competition driven by selfish thoughts [49]. Hence, morality allows the individual to extend their perspective beyond the self and their own desires and benefits. It puts the individual in the center of collective social order. Therefore, morality is seen as the first-person plural “we” and basic adherence binds people together and societies emerge. From the first emergence of humanity, morality has always functioned as the basis of the sense of trust among all members of a society. Thus, it has ensured social order and helped humanity avoid uncertainty. Morality can be seen as an intrinsic quality of life that invisibly binds us with each other [7].

However, there is a mystery about how morality emerged and where it is rooted. This debate can be brought back to Darwin [49]. According to Darwin, the bedrock of morality was sympathy, which he conceived as a social instinct. Darwin noted that sympathy turns into morality through group selection [12]. He observed different societies and discovered several detrimental rules and errors emerging in the evolutionary social process.

Darwin’s idea initiated a debate that has continued, and some theories have been developed. Nativist theories propose that morality is a unique inborne feature of human mind [19]. On the contrary, empiricist theories emphasize that human mind is a blank state and morality is gained and learnt through social interactions established in cultural settings [61]. Therefore, morality varies from one culture to one another according to empiricist theories. Rationalistic theories also invented claims about the emergence of morality. Piaget (1932) argued that morality is neither innate nor learnt from adults in a cultural setting [41]. In his moral development theory, he concluded that morality is a kind of self-constructed schema. Morality emerges when children’s minds are suitable, and the right kinds of experience are available around them. In other words, it is related to cognitive development. Children can produce moral reasoning for themselves along with their cognitive development. Kohlberg (1975) expanded Piaget’s observations, quantified Piaget’s theory, and addressed moral development within six successive developmental stages [29]. Kohlberg (1966) stated that morality emerges based on reasoning skills of children via interaction with their social world and observed that the conclusions Piaget had reached about children’s reasoning in relation to their physical world fitted Kohlberg’s theory [26]. Consequently, Piagetian and Kohlbergian advocates consider that moral knowledge is sourced in reasoning skills that fully depend on cognitive development and focus on avoidance of doing harms to self and others [16; 65].

The debate over where morality comes from influences how morality can be reliably and validly measured. Piaget (1932) claimed that morality is strictly related to rational thinking and children can reason moral issues about for themselves [41]. Kohlberg (1966) was inspired by Piaget's argumentation and measured morality through moral dilemmas requiring reasoning skills [26]. Kohlberg’s notion that morality can be measured through moral dilemmas in a reliable and valid way has dominated the literature and a great number of researchers prepared imaginary situations in which children need to play a role and put themselves into other situations. In the instruments, dilemmas are used to ask children, adolescents, and young adults to choose the best options which result in the least harm [8, 9, 18, 40, 44, 45, 48, 54, 66].

Kohlbergian and Piagetian approaches to morality received many criticisms due to the fact that it has an overly individualistic orientation and is valid only for secular societies. Moreover, opponents of Kohlbergian and Piagetian theories argue that measuring morality via dilemmas does not work in hierarchical contexts and ignores macro level societal circumstances [20, 51, 53, 50, 52].

Morality has many dimensions and cannot be restricted to one form and concept [49]. Morality also has socialistic aspects, as it has individualistic aspects. Culture also influences the dimensions of morality. Benedict (2006) divided all human cultures into two sections: guilt culture and shame culture [6]. In guilt cultures, morality is seen as a voice, with this voice conceptualized as the conscience. This conscience produces insights for individuals about whether an action is wrong or right. Contrary to this, morality is internalized as an external demand of what the society expects from the individual in shame culture. The main driver of morality is avoidance of shame from others in shame culture. Therefore, this distinction leads to differences in personality. Shame cultures make individuals other-directed, while guilt culture leads individuals to be inner-directed. Shame requires contemplation about how our actions appear to others who make judgements about our actions [49]. Morality helps individuals avoid reprimand, shame, and blame from others in shame cultures, but it is the construction of an inner voice which triggers the conscience over whether a behavior is good or bad, right or wrong in guilt culture. Wrongdoing is a threat to personal integrity and this threat can be removed by confession, remorse, and restitution to overcome the threat emerging from violation of morality. Consequently, sincere disclose of a bad or wrong behavior is encouraged in guilt culture. However, in a shame culture, wrongdoing is perceived as a stain that can be never removed; hence, violation of moral rules is kept secret by any means [30, 36]. Based on the comparison of the cultures, it can be argued that being moral refers to hiding wrong and bad actions and avoiding public shame in shame culture, whereas morality means possession of a highly sophisticated inner voice that prevents wrong and bad actions, which are a hazard for personal integrity in guilt culture. Sacks (2020) addressed this distinction from a different perspective and noted that morality is related to the sense of sight in shame culture while it is about sense of hearing in guilt culture [49].

The distinction of shame culture and guilt culture by Benedict [6] provides a very different insight into morality because the distinction structures the emotions, cultural and anthropological features of morality.

The Moral Root Scale was developed within the Turkish cultural context, where moral judgment is influenced by a complex interaction among religious, cultural, and educational factors. In particular, Islamic understanding deeply shapes public conceptions of what is right, fair, and just, promotes values such as honesty, respect, and responsibility [1, 68]. Besides, collectivistic orientations in which moral expectations are closely tied with social norms and avoidance of public shame are embedded in Turkish society. These features of Turkish culture fits into what Benedict (2006) describes as a shame-based culture, where moral action is externally decided and defined [6]. Turkey is also such a secular state that a national education system includes modern psychological and educational theories in national primary curriculum. Recent curricular renovations bring Virtue–Value–Action Approach**,** emphasizing cultural-spiritual and national values to primary curriculum. On the other hand, it also encompasses components of emotional literacyand **social**-emotional learning which foster moral reasoning and judgement through internal reflection, and develop personal moral compass, aligning with  guilt-oriented moral regulation. As a consequence, Turkish culture can be considered as a unique duality where both shame-basedand internal guilt-based moral orientations converge. Therefore, both of the moral orientations coexist in Turkish society. Thus, the scale can help to understand how this duality exists across different sections of Turkish society. Besides, Turkish society is such a dual society in terms of the division by Benedict [6] that it can be easily adapted for primary school students living under different cultural contexts.

Existing instruments measure morality in childhood based on dilemmas which trigger moral reasoning and judgement in a cognitive way. For instance, Kohlberg (1963) developed an instrument which assesses morality through dilemmas [28]. Even if Piaget (1932) did not design a scale that measure morality of children, he developed a moral development theory which explains moral judgement among children through moral dilemmas [41]. Tangney (1990) dealt with shame and guilt based on psychological process and developed the Self-Conscious Affection and Attribution Inventory (SCAAI) for adults through scenarios [56]. Moreover, other existing scales such as the Test of Self-Conscious Affect (TOSCA-A) by Tangney et al. [58], the Test of Self-Conscious Affect (TOSCA-3) by Robins et al. [46], Mosher Forced Choice Guilt Inventory (MFCGI) by Mosher [37], the State Shame and Guilt Scale (SGSS) by Marschall et al. [33] are another insturments adressing through scanario-based items and measure shame-guilt distinction on pscyhological process. Therefore, neither Piagetian and Kohlbergian way of instruments nor those scenario-based instruments take emotional-cultural roots of moral decision into consideration. Cocneptual framework of Benedict (2006) function as a cenceptual lens in order to grasp how moral decisions of primary school students are rooted and made either internally or externally [6]. Although conceptual framework of Benedict [6] has been largely discussed in anthroplogical and cross-cultrual research [5, 20, 67], this conceptual framework has not been used in psychometric instruments for primary school students. The present research adresses this gap by combining Benedict [6] cultural-emotional aspect of morality with a scale development. As a consequence, it aims to move moral assesment beyond cognitive stages and moral dilemmas, scenario based measurement.

**Purpose of the research:**

History of measuring morality goes back to beginning of 20th century (e.g. 43, 34] and several instruments have been developed along with Piagetian and Kohlbergian theories based on cognitively moral dilemmas. There are also instruments such as the TOSCA-A [64] and observational scales by Alessandri and Lewis [2]. Even if they partially overlap with the aim of the present research. However, neither they were specifically developed for primary school students nor were they subjected to modern psychometric analytic procedures. These instruments address emotional traits and self-conscious affect rather than morality and do not focus on cultural basics of moral orientations such as the distinction shame-based reasoning and guilt-based reasoning that manage moral decision making. Hence, the present research deals with the need of culturally contextualized, and psychometrically tailored scale for primary school students.

Piagetian and Kohlbergian approaches dominated after 1960, so there are numerous instruments measuring morality on a reasoning basis through dilemmas. These approaches addressed morality from a very individualistic perspective. Therefore, morality was conceptualized in different terms and different instruments were also designed for children in relation to moral identity [10], moral orientation [11], moral development [62], moral disengagement [4], and moral emotions [20]. These instruments were based on different theoretical backgrounds. Tracy and Robins (2006), Keltner (1996), and Smith, Webster, Parrott, and Eyre (2002) developed instruments in accordance with Benedict [6]’s distinction [59, 24,55]. However, all of these tools are for young adults and adults, not for primary school children.

Primary school is the period in which children gain literacy skills. Consequently, this is the first period in which the emotional moral root can be measured through their use of literacy without dependence on adults. Hence, independence may produce a more crystallized moral root of children. As a result, the present research aimed to develop the Moral Root Scale (MRS) for primary school students.

**Method**

**Design of the research:**

The present research was designed in the form of a survey study in order to generalize findings about the reliability and validity of MRS for primary school students [15].

Development of MRS occurred in two phases: construction of the scale, and norming and standardizing the scale [38].

**Construction of the scale:** Construction of the test included literature review, interviews with three children, item writing, developing item responses, scrutinization of the draft scale by experts and the three children, and revising the final draft the MRS.

Relevant literature about morality were reviewed to yield drafts of the items. For this reason, studies by Benedict [6], Sacks [49], Shweder and Bourne [51], Shweder and LeVine [53], Shweder [50], Shweder and Haidt [52], Robins [47], Keltner [24], Smith, Webster, Parrott, and Eyre [55] were read and scrutinized to produce item pools.

Verbal approval was obtained from three parents and their children were interviewed. Two questions were asked to the students during the interview, and these questions are included as an additional file. In the unstructured interview, they were asked what deterred them from faults or violations of a school or family rule, such as harassing their friends or harming them. Their responses in the interview enabled contexts for the items to be produced that are compatible with daily life of children. Finally, 13 contexts which embody moral violations were developed. These contexts were created to encounter children to moral violations such as disobedience a rule, hiding a wrongdoing from somebody or public. For each of the context, two response options were constructed to grasp the primary school students’ moral regulation and orientation. The first response option of all contexts was prepared in accordance with shame-based reasoning such as avoidance from public disapproval and the later one was designed according to guilt-based reasoning such as internal conflict, conscience. This way of contextualization, in turn, enabled the MRS to operate the conceptual and theoretical distinction proposed by Benedict [6].

The draft of the MRS was scrutinized by three experts. Of the examining experts, 1 was an primary class teacher, 1 was child psychologist, and 1 was a child literature expert. After the draft was revised in accordance with the suggestions from the experts, it was given to the three children. Of the children who were observed, 1 was female and 8 years old, 2 were male aged 9 years old. The children were observed and asked if they had any difficulty in comprehending any of the items and their response choices. The draft was revised again with respect to the difficulties the children encountered. As result of the process, the draft of the MRS encompassed 13 items with two response choices.

**Norming and standardizing of the scale:** This phase included three steps of norming-defining the target population, sampling procedures, and standardization. Norming and defining the target population requires determination of the intended use of any instrument [38]. Since the intended use of the MRS is to reliably and validly measure the moral root of primary school children who have just gained literacy skills, the target population for the research was identified to be primary school children whose ages range between 7 and 10 years. This age range is the primary school period in Turkey.

Sampling procedures included official and ethical approval, and recruitment of participant primary school students in accordance with ethical rules. A research protocol about how the research would be conducted was prepared and submitted to the Ministry of National Education in Turkey. A panel from the Ministry of National Education investigated the research protocol and the draft of the MRS. The panel officially found the research protocol and the draft abided by ethical rules. After ethical and official approval from the Ministry, the cities of Artvin, Samsun, Adana, Antep, Antalya, Istanbul, Ankara, and Izmir were selected for sampling in the research due to fact that these cities represent geographical and cultural differences in Turkey. One school in each of the cities was selected from the web site of directorates of local education in those cities.

For participants under the age of 16, informed consent to participate has been secured from their parents. Therefore, a parental consent letter has been prepared to be given to the parents of potential student participants. A manual was prepared for teachers. The letter explained how to administer the MRS to their students in a very detailed way to standardize data collection. Then principals and teachers in selected schools and cities were contacted by phone. The aim of the research was explained to the teachers who accepted their students participation in the research. The MRS, manual for teachers about how to administer the MRS and permission letters for the participant children were posted to the schools. A total of 278 MRS scales and permission letters were returned. Of the children who took part, 63 were seven years old, 72 were eight years old, 75 were nine years old, and 68 were ten years old. As a result, 278 primary school students were recruited for item analysis and exploratory factor analysis. 21 Participants left 28 missing values and the missing values were replaced with the means.

**Data analysis:**

Analyses included item analysis, construct validity through exploratory factor analysis (EFA), confirmatory factor analysis (CFA), convergent validity based on average variance extracted (AVE) and correlation between the MRS and the moral identity test (MIT), and reliability analysis through Cronbach Alpha (α) and omega coefficient (ω).

Based on item analysis, consistency among items and between items and overall measures can be identified. As a result, identification of deficiencies can be revealed at the beginning of the analytic cycle [39]. After item analysis was performed, EFA was carried out. EFA is an essential statistical procedure to disclose the latent construct of the MRS.

In the light of EFA results, the CFA procedure was administered to test what extent the factorial construct fits the real data. Standardized Root Mean Residual (SRMR), Root Mean Square Error of Approximation (RMSEA), Tucker-Lewis Index (TLI), Incremental Fit Index (IFI), Comparative Fit Index (CFI), Adjusted Goodness of Fit Index (AGFI), and Goodness of Fit Index (GFI) were used for CFA (Kline, 2011). After CFA, construct validity was examined through Average Variance Extracted (AVE) and correlation between MRS and Moral Identity Test (MIT) and then reliability analysis was computed using the Cronbach Alpha and Omega coefficients.

All of the analyses were carried out in a computer using R. *psych* package for item analysis, reliability analysis using α, ω and EFA. The *lavaan* packages and *SemTools* were utilized for CFA and AVE.

**Results**

When data were coded, the distinction between guilt culture and shame culture were taken into consideration. Moral sense stemming from guilt culture is superior over moral sense emerging from shame culture [49]. Hence, responses related to moral sense stemming from guilt culture were coded as “2”, while responses related to shame culture were coded as “1”.

Before the data analysis, missing values were detected in R and then they were coded again with mean values by coding *df [is.na(x)] < − mean (x, na.rm. = TRUE).*

**Item analysis:** Item analysis was carried out using corrected item-total correlation and are demonstrated in Table 1. Total scores of the MRS are continuous variable but the items have such two response options that the items were treated as binary data. Therefore, Correlation analysis was implemented through Point-Biserial Correlation.

**Table 1: Item Analysis**

| Item No | Mean | SD | Corrected Item-Total Correlation |
| --- | --- | --- | --- |
| 1 | 1.88 | .31 | .21 |
| 2 | 1.84 | .31 | .45 |
| 3 | 1.70 | .45 | .39 |
| 4 | 1.78 | .41 | .39 |
| 5 | 1.77 | .42 | .39 |
| 6 | 1.88 | .32 | .40 |
| 7 | 1.72 | .44 | .35 |
| 8 | 1.84 | .36 | .49 |
| 9 | 1.80 | .39 | .49 |
| 10 | 1.88 | .27 | .17 |
| 11 | 1.88 | .31 | .32 |
| 12 | 1.88 | .39 | .51 |
| 13 | 1.81 | .40 | .39 |

Higher corrected item-total correlation than .30 indicates that the item measures the same trait or disposition as the overall instrument. Corrected item correlation lower than .30 means that the item measures a different trait or disposition from the overall instrument. Therefore, corrected item-total correlation has remarkable influence over reliability [39]. As a result of item analysis, item 1 and item 10 were discarded from the rest of the analysis owing to corrected item-total correlations lower than .30.

EFA was conducted through R using the *psych* and *GPArotation* packages*.* EFA identifies inter-correlated items and groups them under the same constructs [14]. The items of MRS have only two response choices that were constructed according to guilt culture and shame culture. Therefore, EFA was carried out based on tetrachoric correlation in order to see if the factor scores are compatible with the latent variable emerged from EFA. Before EFA, the Kaiser-Meyer-Olkin (KMO) coefficient and Barlett’s test were investigated. KMO was observed to be .86 and Barlett’s test was significant (χ2 = 547.84, 02; p ≤ .05). Therefore, the sample was adequate enough to conduct EFA [14, 22]. Morover, based on the KMO and Barlett’s test results, it was seen the data can yield compact and reliable factors.

**Exploratory factor analysis (EFA):** The Varimax rotation was used because it makes factors more interpretable by increasing dispersion of factor loadings [14, 42]. The number of factor loadings were determined by Eigenvalues. As understood from Table 2, there is only one factor with Eigenvalues higher than 1. As a result, it was decided that the MRS consists of one factor.

**Table 2: The Number of Factors According to Eigenvalue**

| **Factor Number** | **Eigenvalue** |
| --- | --- |
| Factor 1 | 3.65 |
| Factor 2 | .97 |

**Table 3: EFA Results**

| **Items** | **Factor Loadings** | **Alpha If Item Deleted** |
| --- | --- | --- |
| Item 8 | .64 | .76 |
| Item 12 | .64 | .75 |
| Item 2 | .57 | .77 |
| Item 6 | .55 | .77 |
| Item 4 | .52 | .77 |
| Item 5 | .50 | .77 |
| Item 7 | .50 | .76 |
| Item 13 | .50 | .77 |
| Item 9 | .42 | .77 |
| Item 3 | .40 | .78 |
| Item 11 | .40 | .78 |
| **Eigenvalues:** 3.10  **KMO:** 86 | | **Barlett’s test of Sphericity**: χ2 = 547.84, 02; p ≤ .05  **Overall Cronbach Alpha (α)**: .79 |

Results of the factor analysis shown in Figure 1.

**Figure 1. Factor Loadings**

**
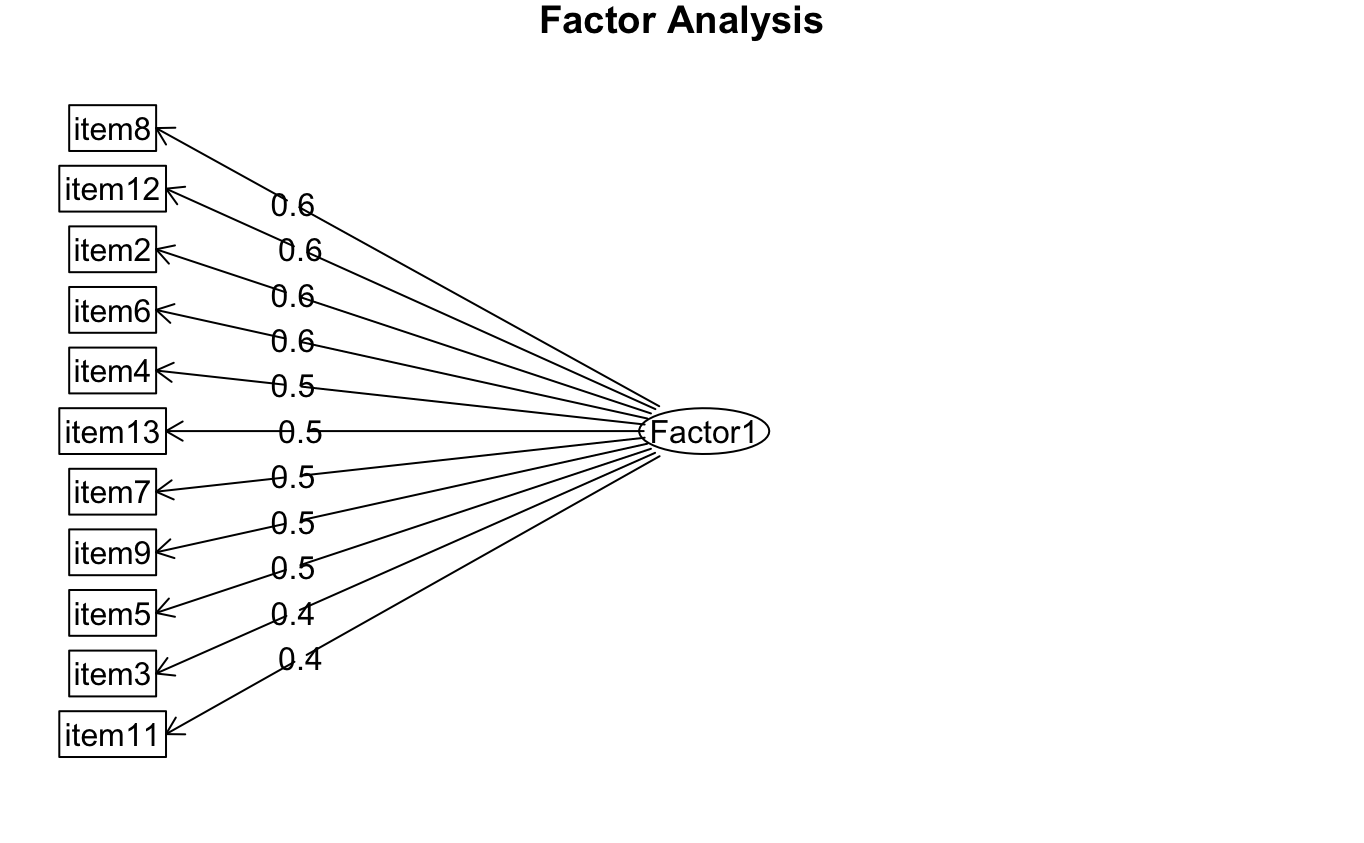
**

Tetrachoric correlation based on maximum likelihood method was computed due to features of the items in the MRS. This is because tetrachoric correlation is very convenient for binary data and enable dichotomous data to be treated in the same way of continues data. The tetrachoric correlation was calculated by using the *psych* pacakges in R. This method can make estimations of linear relationships between the latent continuous variable based on binary responses [17, 32].

Result of tetrachoric correlation was displayed in Table 4.

**Table 4: Results of Tetrachoric Correlation**

|  | **Item 2** | **Item 3** | **Item 4** | **Item 5** | **Item 6** | **Item 7** | **Item 8** | **Item 9** | **Item 11** | **Item 12** | **Item 13** |
| --- | --- | --- | --- | --- | --- | --- | --- | --- | --- | --- | --- |
| **Item 2** | **1.00** |  |  |  |  |  |  |  |  |  |  |
| **Item 3** | **.31** | **1.00** |  |  |  |  |  |  |  |  |  |
| **Item 4** | **.57** | **.42** | **1.00** |  |  |  |  |  |  |  |  |
| **Item 5** | **.41** | **.52** | **.30** | **1.00** |  |  |  |  |  |  |  |
| **Item 6** | **.62** | **.40** | **.47** | **.48** | **1.00** |  |  |  |  |  |  |
| **Item 7** | **.54** | **.42** | **.54** | **.55** | **.42** | **1.00** |  |  |  |  |  |
| **Item 8** | **.63** | **.41** | **.54** | **.43** | **.67** | **.48** | **1.00** |  |  |  |  |
| **Item 9** | **.40** | **.53** | **.41** | **.48** | **.50** | **.32** | **.46** | **1.00** |  |  |  |
| **Item 11** | **.50** | **.30** | **.31** | **.30** | **.36** | **.31** | **.51** | **.33** | **1.00** |  |  |
| **Item 12** | **.62** | **.43** | **.61** | **.50** | **.61** | **.38** | **.73** | **.51** | **.46** | **1.00** |  |
| **Item 13** | **.47** | **.32** | **.40** | **.39** | **.52** | **.45** | **.56** | **.48** | **.46** | **.46** | **1.00** |
| **Correlation Score of the Factor: .**96  **R Squares of the Factor:** .92 | | | | | | | | | | | |

Table 4 which presented correlation matrix revealed that the thetrachoric correlation varied between .30 and .72 reporting moderate to strong correlations among the items. Value of R square based on the tetrachoric correlation demonstrated that one-factor solution explained .92 of total variance. Correlation score with the factor reports correlation how accurate factor scores represent the factor. It was found. 96 and it proved that factor scores robustly represent the factor [32].

**Confirmatory Factor Analysis (CFA):** The sampling procedures which were reported in norming and standardizing were followed again and 124 primary school students were recruited. The MRS containing 11 items was administered to them.

CFA is a way to test whether a latent constructed model fits the real data well or not. CFA was conducted through Weighted Least Squares Means and Variance Adjusted due to the fact that the data ordinal and items in the MRS have two response choice [31]. In CFA analysis, SRMR, RMSEA, CFI, TLI, AGFI, GFI and IFI were reported. Results of CFA indicated that SRMR = .04, RMSEA = .04, TLI = .94, CFI = .96, IFI = .97, GFI = .95, and AGFI = .95. RMSEA and SRMR values changing between 0 and .05 is proof of strong model fit. Values of CFI, TLI, IFI, AGFI, GFI, and IFI of .90 or above are evidence of good model fit indices [25]. Figure 2 proves that all standardized factor loadings range between .35 and .65. Based on CFA analysis, the MRS has good model fit and its theoretical construct with the single factor solution and 11 items was verified by the data. Results of the analysis shown in Figure 2.

**Figure 2: Single Factor Construct with Standardized Item Loadings and Correlations**
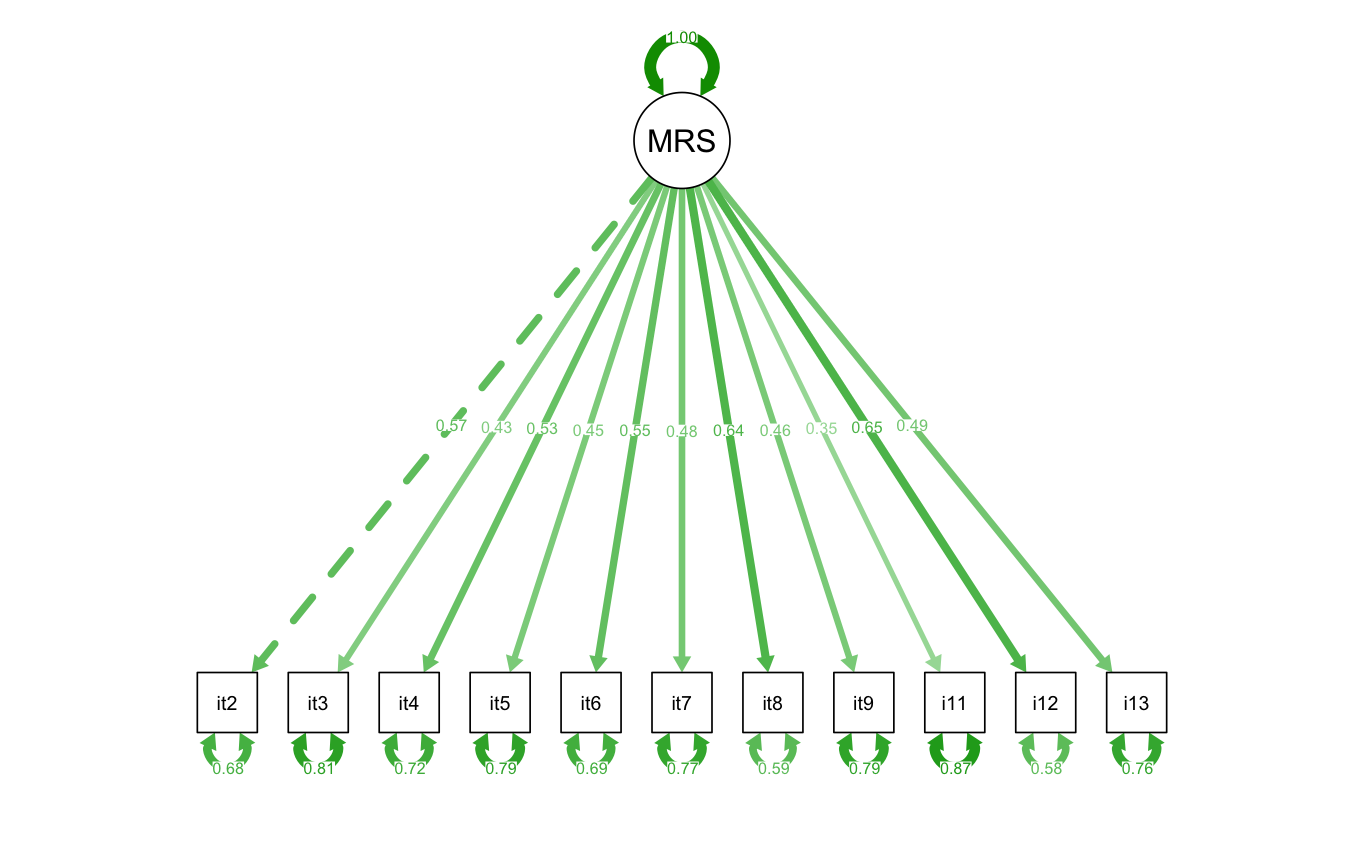


**Convergent validity:** Average Variance Extracted (AVE) was used to report convergent validity of the MRS. AVE is described as a measure of amount of variance that is caught by a construct through comparison with variance due to measurement error [13]. The *lavaan* package in R was used for calculation of AVE. AVE was .79. AVE higher than .50 is proof of convergent validity, so it was observed that the MRS has strong convergent validity.

Additionally, convergent validity was examined by investigating convergence with other measures that are theoretically related to the MRS. This is because convergence validity is an indicator of the degree to which two constructs are related to each other [38]. For this reason, the Moral Identity Test (MIT) developed by Coskun & Kara [10] was used. This is because moral identity is another aspect of human morality and the correlation between the MIT and the MRS was examined. The same procedure was followed for data collection, and 139 primary school students were recruited for convergent validity analysis. Correlation analysis was carried out through total scores of the MRS with 11 items and the total scores of MIT. Results of the correlation analysis are displayed in Table 3.

**Table 4: Results of Correlation between MRS and MIT**

| **Measurements** | **n** | **r** | **p** |
| --- | --- | --- | --- |
| MRS | 125 | .55 | .04 |
| MIT |

As result of correlation analysis, there was a positive, significant, and moderate correlation between the MRS with 11 items and the MIT (r=.55, p<.05). Based on the results it can be argued that the participant primary school students who score higher on the MIT have higher scores on the MRS than participant primary school students with lower scores on the MIT.

As result of AVE results and the correlation between the MRS and the MIT, the MRS has robust convergent validity.

**Reliability analysis:** Reliability of the MRS was analyzed using both internal consistency with Cronbach alpha (α) and omega coefficients (ω). Value of α was.79. Moreover, deleting any items did not lead to any increase in the coefficient. Therefore, the single factor solution for the MRS has good internal consistency. Reliability analysis also applied the omega total (ωt) and omega hierarchical (ωh). ωt refers to the estimated proportion of variance that is attributable to the construct. Value of ωt for the MRS was .88. This value of ωt  is reported to be a highly reliable dimensional composite. ωh indicates how much variance can be attributed to a common factor. Hence, ωh assesses the precision of variance measured by a single construct. The ωh of the MRS was .71. This result proves that the single factor solution for the MRS is the major source of systematic variance in the overall score [63]. Values of ωt and ωh revealed that the single factor of the MRS accounted for substantial variance. Results related to α, ωt, and ωh proved that the MRS with a single factor solution and 11 items has coherent internal consistency with strong associations between the items and the construct of the MRS.

**Discussion:**

Overall, the results of the research indicated that MRS can produce reliable and valid results for measurement of moral understanding of primary school students in terms of the distinction between shame culture and guilt culture conceptualized by Benedict [6]. EFA results revealed that the MRS consists of one latent construct with eleven items. CFA results proved that the single factor solution with eleven items has good fit to real data. AVE results and correlation between the MRS and the MIT verified convergent validity. Results of α, ωt, and ωh supported the view that the MRS is a reliable instrument. In other words, results of the research proved that the MRS can validly and reliably measures through the distinction between shame and guilt that has been rarely used in psychometric instrument development for measuring morality in primary school students. Consequently, applying the conceptual framework of Benedict [6] moved the measurement of morality in primary school students beyond assessment of morality with dilemmas and scenario-based approach.

Morality has been addressed through different concepts like moral development [43], moral skills [34], moral orientation [11], moral development [62] moral disengagement [4], moral emotions [69] and moral identity [10]. However, none of the concepts and their instruments relate to the distinction between shame and guilt. There are several instruments that were developed in accordance with the distinction between shame and guilt. These instruments include the Test of Self-Conscious Affect-TOSCA-A [58], Test of Self-Conscious Affect (TOSCA-3) developed by Robins, Noftle, and Tracy [46], the Self-Conscious Affect and Attribution Inventory (SCAAI) designed by Tangney [56], Mosher Forced Choice Guilt Inventory (MFCGI) designed by Mosher 837] and the State Shame and Guilt Scale (SGSS) [33]. Watson et al. (2016) adapted the TOSCA-A for the children aged between 8 and 11 [64]. The TOSCA-A is an scenario based instrument and aims to measure self-consciousness along with the distinction between emotions of shame and guilt. Purpose of the MRS is to measure to determine how primary school students prefer to choose way of their moral actions when they need to morally act. Although both of the instruments’ target is similar, they differ from each other in terms of way of measurement and dispositions seeking to assess. Moreover, Allesandri and Lewis (1993) developed an observation-based instrument in accordance with the distinction between shame for children, but it was not designed in accordance with psychometric statistical procedures [2]. The MRS was developed through robust and strong psychometric statistical procedures. Therefore, the MRS is the first scale developed as a result of robust psychometric statistical procedures, which significantly contributes to the relevant literature.

Morality binds all individuals within a society and removes uncertainties about behavioral codes. Therefore, morality has attracted attention since Plato. Plato viewed morality as rational control of emotions [20]. Darwin (2013) dealt with morality in the context of group selection [12]. Therefore, Darwin can be considered the first person who addressed morality on a group basis. As cognitive psychology was on the agenda, Piaget (1932), Kohlberg (1969), and Turiel (1983; 2008) investigated morality on an individual basis and dominated the research about morality [41,27,60,61]. Their moral theories are suitable for secular societies. Shweder (1990), and Shweder and Haidt (1993) opposed this view of morality and argued that morality has social and cultural dimensions [50, 52]. Because morality is closely related to what society expects from individuals and what the individual conforms to, what kind of feeling emerges, care, avoidance of harm, loyalty, betrayal, fairness, cheating, how social and cultural factors drive the individual to behave in a certain way [20]. Similarly, Benedict (2006) noted that there are two kinds of culture that drive people to behave morally [6]. Shame is public emotion arising from public exposure and disapproval of moral failure and transgression. On the contrary, guilt is a more private moral emotion emerging from conscience [6, 57]. In shame culture, avoidance of being seen in cases of misconduct is the main drive of morality. Being guilty requires feeling and listening to an inner voice about any behavior, so listening to the inner voice about behavior is the main trigger for morality. Hence, this distinction creates differences in personality. Avoidance of being seen in the case of moral transgression or failure makes people focus on others, whereas feeling and listening to the inner conscience leads individuals to monitor their inner voice. In shame culture, the individual is other-directed, while in guilt culture the individual tends to be inner-directed [49]. The MRS was designed to enable determination of what primary school students feel when their behavior is not compatible with universal moral rules. Consequently, it can identify the main driver of morality for primary school students and their moral culture in terms of the distinction by Benedict [6]. Primary school teachers and researchers can use the MRS to identify the moral root and emotions of primary school students.

**Conclusion:** The present research aimed to develop the MRS and report its psychometric properties. As a result of item analysis, item 1 and item 10 were discarded from the rest of the analysis due to low item-total correlation. EFA results indicated that the MRS consists of one factor with 11 items. CFA analysis proved that the MRS with a single factor and 11 items was well suited to the data. AVE results and the correlation with the MIT proved good convergent validity of the MRS. Finally, α, ωh, and ωt  indicate that the MRS is a reliable instrument for measurement of moral roots in primary school students.

**Limitations of the research:** The MRS was developed in the Turkish language. Morality involves social-cultural dimensions so its adaptation into other languages can be conducted in future research.

Reliability analysis was carried out by reporting α, ωh, and ωt  values so test-retest reliability of the MRS can be studied in future research.

### **List of Abbreviations**

AGFI: Goodness of Fit Index

AVE: Average Variance Extracted

CFA: Confirmatory Factor Analysis

CFI: Comparative Fit Index

EFA: Exploratory Factor Analysis

GFI: Goodness of Fit Index

IFI: Incremental Fit Index

MIT : Moral Identity Test

MRS : Moral Root Scale

RMSEA: Root Mean Square Error of Approximation

SRMR :Standardized Root Mean Residual

TLI: Tucker-Lewis Index

**Ethics, Approval and Consent to Participate**: Ethical approval for this study was obtained from the Ethics Committee of [Artvin Coruh University] (Approval Number: [E-18457941-050.99-68783], Date: [01/11/2022]). Following this, official permission was obtained from the Turkish Ministry of National Education to conduct the study in schools. All procedures involving human participants were carried out in accordance with the ethical standards of the institutional and/or national research committee and with the 1964 Helsinki Declaration and its later amendments or comparable ethical standards. A parental consent letter was written to be given to parents of potential participant students. İndividuals younger than are under 16 years of age informed consent to participate has been obtained from their parents. Participation was voluntary, and informed consent was obtained from all participants prior to data collection.

**Consent for Publication**: Not applicable. This manuscript does not contain any identifiable personal data from participants. All participants took part voluntarily, and informed consent was obtained prior to data collection.

**Availability of Data**: The data and materials are available and can be provided upon request.

**Competing Interests**: There is no competing or conflict of interest among the authors.

**Funding:** The present submission has not received any funding.

**Authors’ Contributions**: Each of the authors has contributed to the present submission.

**Acknowledgement**: Not Applicable.

**References**

1. Akşit B, Akşit EE. Shifting conceptions of science, religion, society and state in Turkey. Middle East Crit. 2010;19(1):71-87.
2. Alessandri SM, Lewis M. Parental evaluation and its relation to shame and pride in young children. Sex Roles. 1993;29(5–6):335–343. <https://doi.org/10.1007/BF00289427>
3. American Psychological Association. APA dictionary of psychology. Washington: American Psychological Association; 2015.
4. Bandura A, Barbaranelli C, Caprara GV, Pastorelli C. Mechanisms of moral disengagement in the exercise of moral agency*.* J Pers Soc Psychol*.* 1996; 71:364–374. <https://doi.org/10.1037/0022-3514.71.2.364>
5. Bedford O, Hwang KK. Guilt and shame in Chinese culture: A cross‐cultural framework from the perspective of morality and identity*.* J Theory Soc Behav*.* 2003;33(2):127–144. <https://doi.org/10.1111/1468-5914.00210>
6. Benedict R. The chrysanthemum and the sword. Boston: Mariner Books; 2006.
7. **Bergmann JR. Introduction: Morality in discourse. Res Lang Soc Interact. 1998;31(3–4):279–294.** <https://doi.org/10.1080/08351813.1998.9683594>
8. **Chaar BB. Professional ethics in pharmacy practice: Developing a psychometric measure of moral reasoning. Pharm World Sci. 2009;31(4):439–449.** <https://doi.org/10.1007/s11096-009-9320-1>
9. Choi YJ, Han H, Dawson KJ, Thoma SJ, Glenn AL. Measuring moral reasoning using moral dilemmas: evaluating reliability, validity, and differential item functioning of the behavioural defining issues test (bDIT). Eur J Dev Psychol. 2019;16(5):622–631. <https://doi.org/10.1080/17405629.2019.1614907>
10. **Coskun K, Kara C. Moral identity test (MIT) for children: reliability and validity. Psicol Reflex Crit. 2019;32.** <https://doi.org/10.1186/s41155-019-0120-9>
11. Craft DA. Children's moral orientation: an instrument validation study to assess school children's moral orientations [Doctoral dissertation, University of San Francisco].1992.
12. Darwin C. The descent of man and selection in relation to sex. London: Wordsworth Publishing; 2013.
13. **Dos Santos PM, Cirillo MÂ. Construction of the average variance extracted index for construct validation in structural equation models with adaptive regressions. Commun Stat Simul Comput. 2023;52(4):1639–1650.** <https://doi.org/10.1080/03610918.2021.1888122>
14. Field A, Miles J, Field Z. Discovering statistics using R. London: Sage Publications; 2012.
15. Fraenkel JR, Wallen NE, Hyun HH. How to design and evaluate research in education. New York: McGraw Hill; 2012.
16. **Gibbs JC. Kohlberg’s moral stage theory: A Piagetian revision. Hum. Dev. 1979;22(2):89–112.** <https://doi.org/10.1159/000272431>
17. **Greer T, Dunlap WP, Beatty GO. A Monte Carlo evaluation of the tetrachoric correlation coefficient. Educ Psychol Meas. 2003;63(6):931–950.** <https://doi.org/10.1177/0013164403251318>
18. Gump LS, Baker RC, Roll S. The moral justification scale: Reliability and validity of a new measure of care and justice orientations. Adolescence. 2000;35(137):67–76.
19. **Haidt J. The emotional dog and its rational tail: A social intuitionist approach to moral judgment. Psychol Rev. 2001;108(4):814–834.** <https://doi.org/10.1037/0033-295X.108.4.814>
20. Haidt J. The righteous mind: Why good people are divided by politics and religion. London: Penguin Books; 2013.
21. Harari YN. Sapiens: A brief history of humankind. New York: Random House; 2014.
22. Henson RK, Roberts JK. Use of exploratory factor analysis in published research: Common errors and some comment on improved performance. Educ Psychol Meas. 2006;66(3):393–416.
23. Hoblitzelle W. Attempts to measure and differentiate shame and guilt: The relation between shame and depression. In: Lewis HB, editor. The role of shame in symptom formation. Hillsdale, NJ: Erlbaum; 1987. p. 207–335.
24. Keltner D. Evidence for the distinctness of embarrassment, shame, and guilt: A study of recalled antecedents and facial expressions of emotion. Cogn. Emot. 1996;10(2):155–172. <https://doi.org/10.1080/026999396380312>
25. Kline RB. Principles and practice of structural equation modeling. 3rd ed. Guilford Publications; 2011.
26. Kohlberg L. Moral education in the schools: A developmental view. Sch Rev. 1966;74(1):1–30.
27. Kohlberg L. The cognitive-developmental approach to socialization. In: Goslin DA, editor. Handbook of socialization theory and research. Chicago: Rand McNally; 1969. p. 347–480.
28. Kohlberg L. The development of children's orientations toward a moral order I. sequence in the development of moral thought. Vita Hum. 1963;11–33.
29. Kohlberg L. The cognitive-developmental approach to moral education. Phi Delta Kappan. 1975;56(10):670–777.
30. Lamb RE. Guilt, shame, and morality. Philos Phenomenol Res. 1983;43(3):329–346.
31. **Li CH. Confirmatory factor analysis with ordinal data: Comparing robust maximum likelihood and diagonally weighted least squares. Behav Res Methods. 2016; 48:936–949.** <https://doi.org/10.3758/s13428-015-0619-7>
32. **Lorenzo-Seva U, Ferrando PJ. TETRA-COM: A comprehensive SPSS program for estimating the tetrachoric correlation. Behav Res Methods. 2012; 44:1191–1196.** <https://doi.org/10.3758/s13428-012-0200-6>
33. Marschall DE, Saftner J, Tangney JP. The State Shame and Guilt Scale. Fairfax, VA: George Mason University; 1994.
34. McGrath MC. A story of the moral development of children. Psychol Monogr. 1923;32(2).
35. Milli Eğitim Bakanlığı (MEB). Türkiye Yüzyılı Maarif Modeli: Öğretim programları ortak metni. 2024. https://mufredat.meb.gov.tr Accessed 4 Jul 2025.
36. Morris H. Guilt and shame. Boston: Wadsworth Publishing; 1972.
37. Mosher DL. The development and multitrait-multimethod matrix analysis of three measures of guilt. J Consult Clin Psychol. 1966;32:690–5.
38. Murphy CO, Davidshofer CO. Psychological testing: Principles and applications. New Jersey: Pearson; 2005
39. Nunnally JC, Bernstein IH. Psychometric theory. New York: McGraw Hill; 1994.
40. **Page R, Bode J. Comparison of measures of moral reasoning and development of a new objective measure. Educ Psychol Meas. 1980;40(2):317–329.** <https://doi.org/10.1177/001316448004000206>
41. Piaget J. The moral judgement of the child. London: Routledge; 1932.
42. Pohlmann, J. T. (2004). Use and interpretation of factor analysis in The Journal of Educational Research: 1992-2002. *The Journal of Educational Research*, *98*(1), 14-23.

1. Pressey SL, Pressey LW. Cross-out tests with suggestions as to a group scale of the emotions; studies from the psychological laboratory of Indiana University. J Appl Psychol. 1919;3(2):138–150.
2. Rest JR, Cooper D, Coder R, Masanz J, Anderson D. Judging the important issues in moral dilemmas: An objective test of development. Dev Psychol. 1974;10:491–501.
3. Rest JR, Narvaez D, Thoma SJ, Bebeau MJ. DIT2: Devising and testing a revised instrument of moral judgment. J Educ Psychol. 1999;91(4):644–659. doi:10.1037/0022-0663.91.4.644.
4. Robins RW, Noftle EE, Tracy JL. Assessing self-conscious emotions: A review of self-report and nonverbal measures. In: Tracy JL, Robins RW, Tangney JP, editors. The self-conscious emotions: Theory and research. New York: Guilford; 2007. p. 443–468.
5. Robins A. Art and Morality: Essays in the Spirit of Santayana by Morris Grossman. Trans Charles S Peirce Soc. 2016;52(1):122–5.
6. **Rudd A, Mullane S, Stoll S. Development of an instrument to measure the moral judgments of sport managers. J Sport Manag. 2010;24(1):59–83.** <https://doi.org/10.1123/jsm.24.1.59>
7. **Sacks J.** Morality: Restoring the common good in divided times*.* Hachette UK; 2020*.*
8. **Shweder RA. In defense of moral realism: Reply to Gabennesch. Child Dev. 1990;61(6):2060–2067.** <https://doi.org/10.1111/j.1467-8624.1990.tb03587.x>
9. Shweder RA, Bourne EJ. Does the concept of the person vary cross-culturally? In: Kleinman A, Eisenberg L, Yalman N, Carstairs N, editors. Cultural conceptions of mental health and therapy. Dordrecht: Springer Netherlands; 1982. p. 97–137.
10. **Shweder RA, Haidt J. The future of moral psychology: Truth, intuition, and the pluralist way. Psychol Sci. 1993;4(6):360–365.** <https://doi.org/10.1111/j.1467-9280.1993.tb00580.x>
11. Shweder RA, LeVine RA. Culture theory: Essays on mind, self and emotion. Cambridge: Cambridge University Press; 1984.
12. **Skisland A, Bjørnestad J, Söderhamn O. Construction and testing of the moral development scale for professionals (MDSP). Nurse Educ Today. 2011; 32:255–260.** <https://doi.org/10.1016/j.nedt.2011.04.002>
13. **Smith RH, Webster JM, Parrott WG, Eyre HL. The role of public exposure in moral and nonmoral shame and guilt. J Pers Soc Psychol. 2002;83(1):138–159.** <https://doi.org/10.1037/0022-3514.83.1.138>
14. Tangney JP. Assessing individual differences in proneness to shame and guilt: Development of the Self-Conscious Affect and Attribution Inventory. J Pers Soc Psychol. 1990;59:102–111.
15. **Tangney JP, Stuewig J, Mashek DJ. Moral emotions and moral behavior. Annu Rev Psychol. 2007; 58:345–372.** <https://doi.org/10.1146/annurev.psych.56.091103.070145>
16. Tangney JP, Wagner PE, Gavlas J, Gramzow R. The test of self-conscious affect for adolescents (TOSCA-A). Fairfax, VA: George Mason University; 1991.
17. **Tracy JL, Robins RW. Appraisal antecedents of shame and guilt: Support for a theoretical model. Pers Soc Psychol Bull. 2006;32(10):1339–1351.** <https://doi.org/10.1177/0146167206290210>
18. Turiel E. The development of social knowledge: Morality and convention. Cambridge: Cambridge University Press; 1983.
19. **Turiel E. Thought about actions in social domains: Morality, social conventions, and social interactions. Cogn Dev. 2008;23(1):136–154.** <https://doi.org/10.1016/j.cogdev.2007.04.00>
20. **Walker LJ. The model and the measure: An appraisal of the Minnesota approach to moral development. J Moral Educ. 2002;31(3):353–367.** <https://doi.org/10.1080/0305724022000008160>
21. **Watkins MW. The reliability of multidimensional neuropsychological measures: From alpha to omega. Clin Neuropsychol. 2017;31(6-7):1113–1126.** <http://dx.doi.org/10.1080/13854046.2017.1317364>
22. **Watson SD, Gomez R, Gullone E. The shame and guilt scales of the test of self-conscious affect-adolescent (TOSCA-A): psychometric properties for responses from children, and measurement invariance across children and adolescents. Front Psychol. 2016; 7:635.** <https://doi.org/10.3389/fpsyg.2016.00635>
23. **Weinreich H. Kohlberg and Piaget: Aspects of their relationship in the field of moral development. J Moral Educ. 1975;4(3):201–213.** <https://doi.org/10.1080/0305724750040303>
24. **White FA. Measuring the content of moral judgement development: The revised moral authority scale (MAS-R). Soc Behav Pers. 1997;25(4):321–334.** <https://doi.org/10.2224/sbp.1997.25.4.321>
25. Wong Y, Tsai J. Cultural models of shame and guilt. In: Tracy JL, Robins RW, Tangney JP, editors. The self-conscious emotions: Theory and research. New York: Guilford Press; 2007. p. 209–223.
26. **Yavuz MH. Is there a Turkish Islam? The emergence of convergence and consensus. J Muslim Minor Aff. 2004;24(2):213–232.** <https://doi.org/10.1080/1360200042000296627>
27. **Zych I, Gómez-Ortiz O, Fernandez Touceda L, Nasaescu E, Llorent VJ. Parental moral disengagement induction as a predictor of bullying and cyberbullying: mediation by children’s moral disengagement, moral emotions, and validation of a questionnaire. Child Indic Res. 2020; 13:1065–1083.** <https://doi.org/10.1007/s12187-019-09670-2>
